# Supplementary material
Source: Royal Society of Chemistry journal article supplement (doi:10.1039/d6ta00230g)
Supplement: d6ta00230g1.pdf [file d6ta00230g1.pdf]

**Supporting Information for**

**Atomically Dispersed Copper in TiO<sub>2</sub> Supported NiO Nanoparticles Drives High CH<sub>4</sub> Productivity,  
Selectivity, and Stability in CO<sub>2</sub> Methanation Via Reversible Oxygen Vacancies Generation**

Amisha Beniwal,<sup>a</sup> and Dinesh Bhalothia,<sup>b\*</sup>

Affiliations:

<sup>a</sup> Department of Engineering and System Science, National Tsing Hua University, Hsinchu 30013, Taiwan

<sup>b</sup> Laboratory for Energy Applications and Functional Materials, Department of Electronics and Communication Engineering, Manipal University Jaipur, Rajasthan 303007, India

\*Corresponding Author:

Prof. Dinesh Bhalothia

Department of Electronics and Communication Engineering,

Manipal University Jaipur, Rajasthan 303007, India

Email: [dinesh.bhalothia@jaipur.manipal.edu](mailto:dinesh.bhalothia@jaipur.manipal.edu)

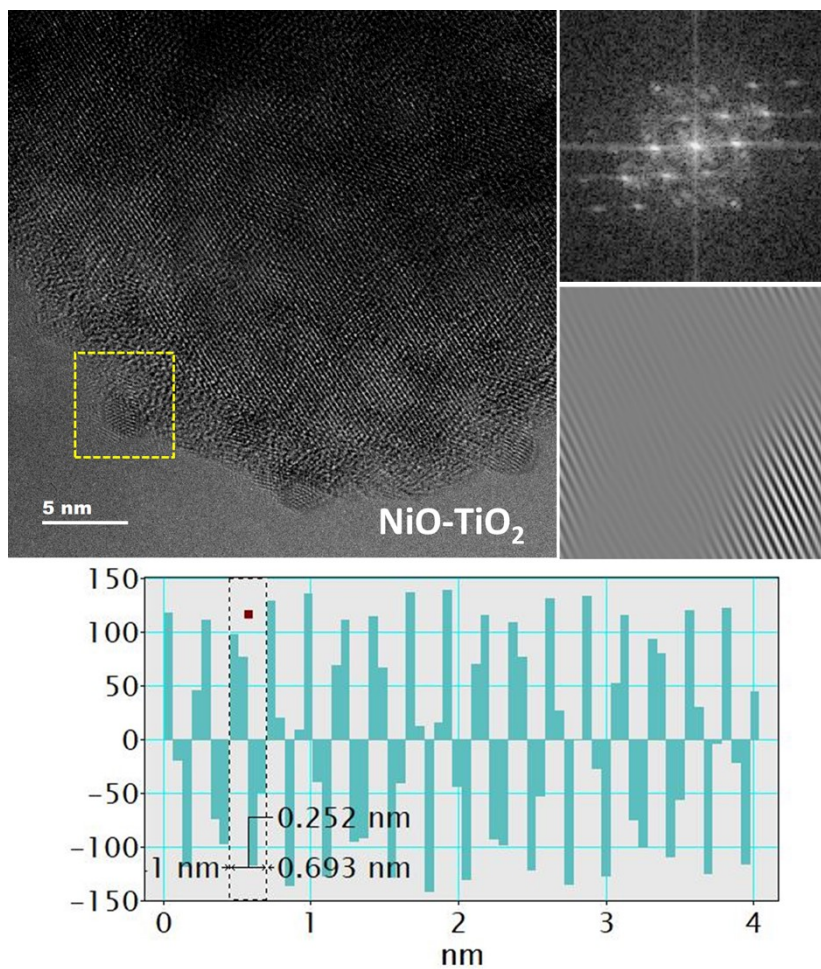

**Figure S1.** The HRTEM image of NiO-TiO<sub>2</sub> catalyst.

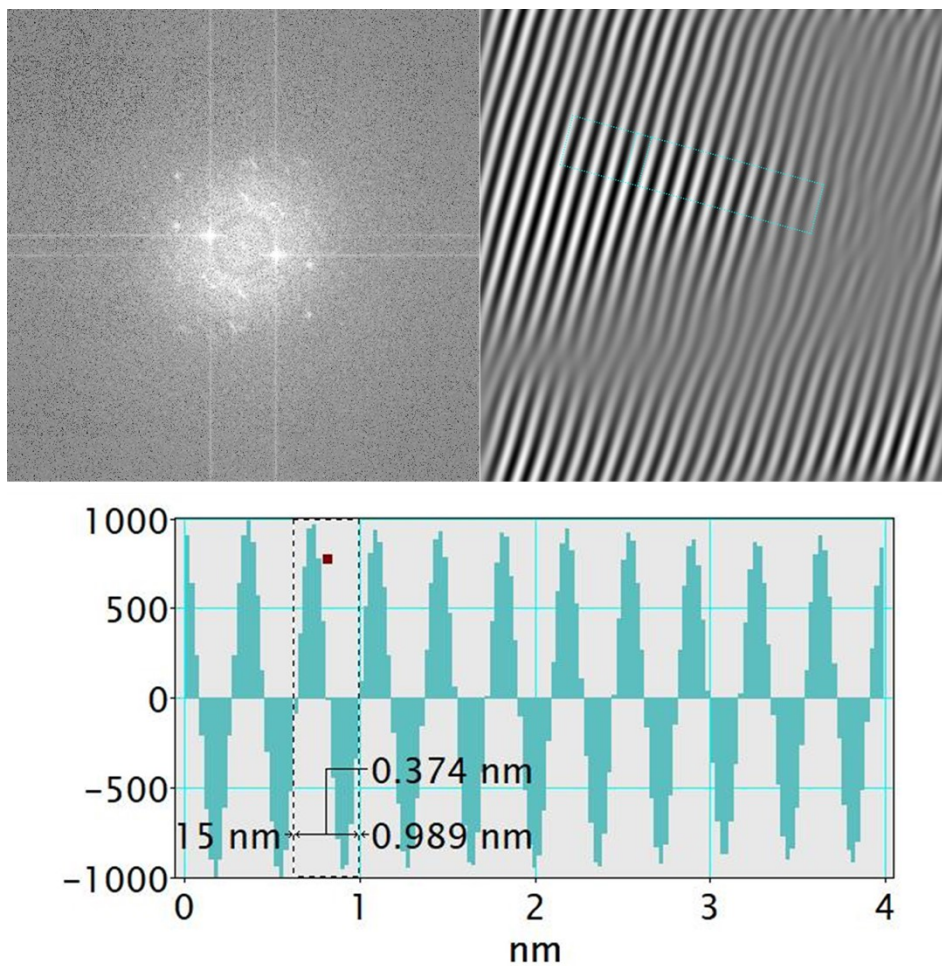

**Figure S2.** The FFT, IFT patterns and corresponding line histograms of NiO-Cu<sub>10</sub> catalyst.

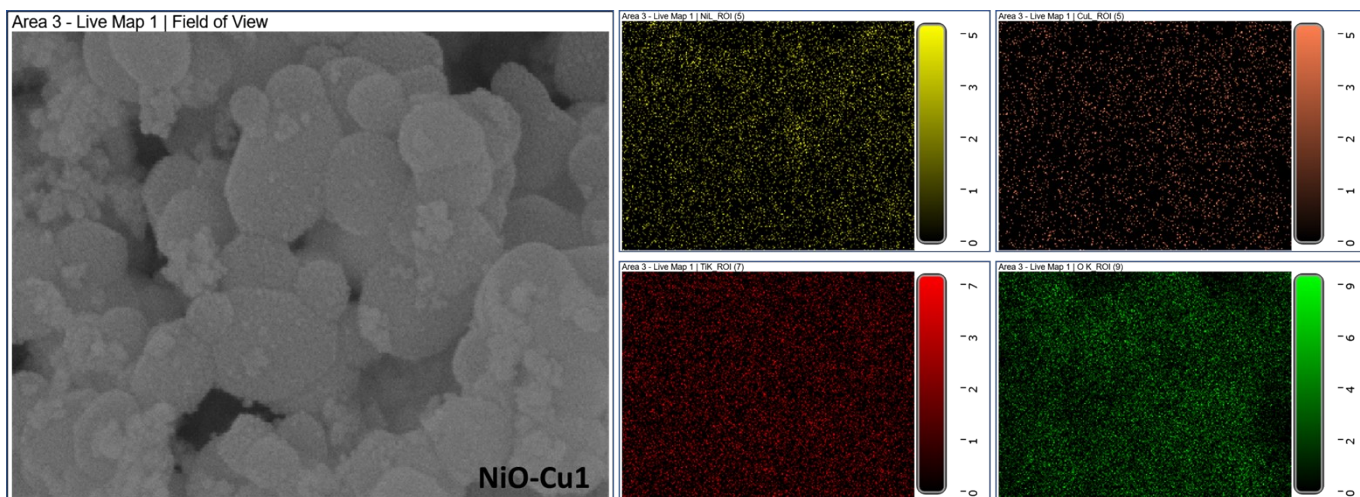

**Figure S3.** FESEM image and corresponding elemental mapping of NiO-Cu1 catalyst.

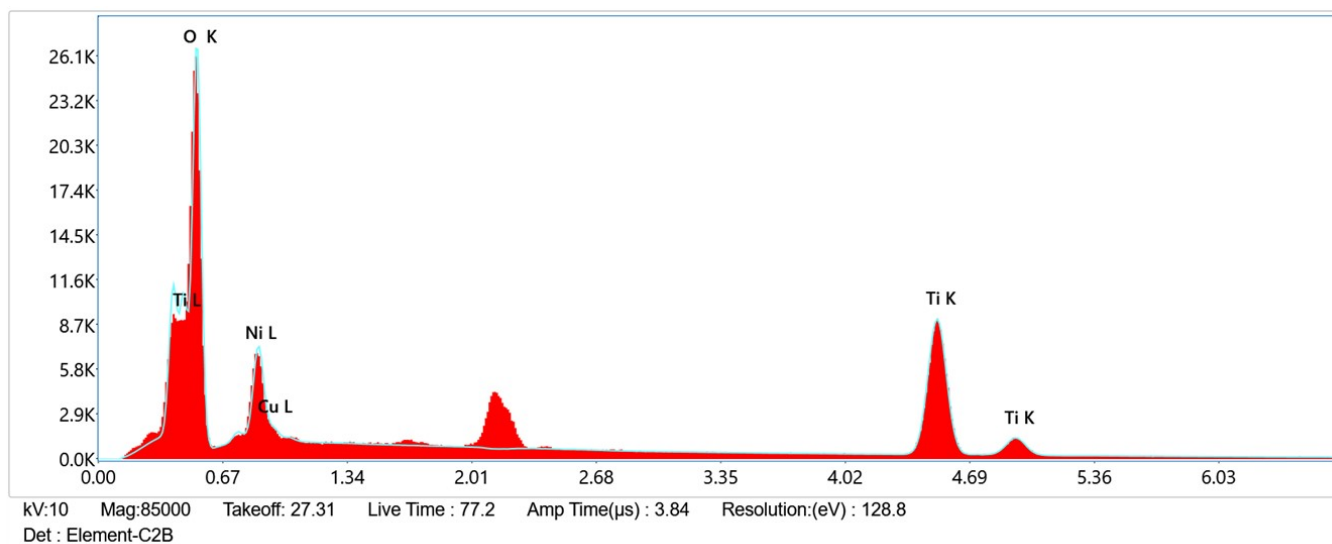

| Element | Weight % | Atomic % | Error % |
|---------|----------|----------|---------|
| O K     | 44.3     | 71.2     | 10.1    |
| Ti K    | 44.9     | 24.1     | 4.0     |
| Ni L    | 9.7      | 4.2      | 9.7     |
| Cu L    | 1.0      | 0.4      | 16.6    |

**Figure S4.** Energy-dispersive X-ray spectroscopy (EDS) analysis and associated quantitative elemental composition (inset table) of the NiO-Cu<sub>1</sub> catalyst.

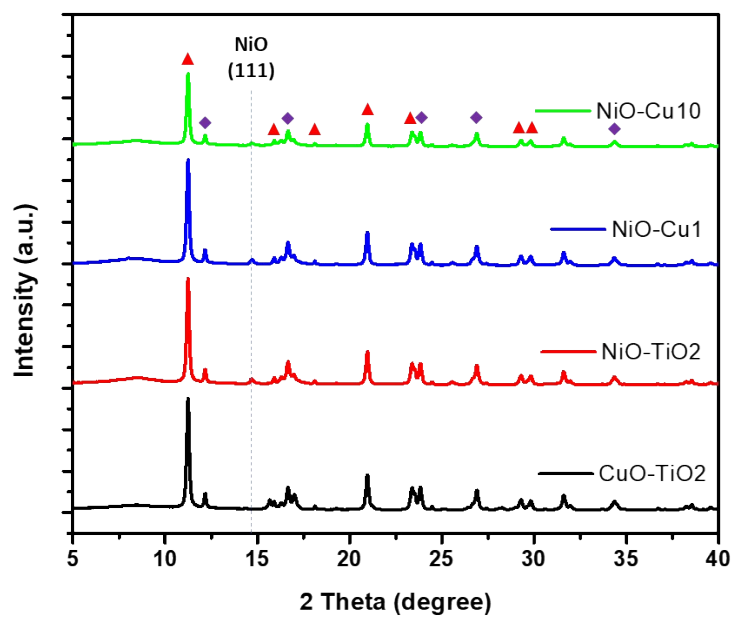

**Figure S5.** The XRD patterns of CuO-TiO<sub>2</sub>, NiO-TiO<sub>2</sub>, NiO-Cu1 and NiO-Cu10 catalysts.

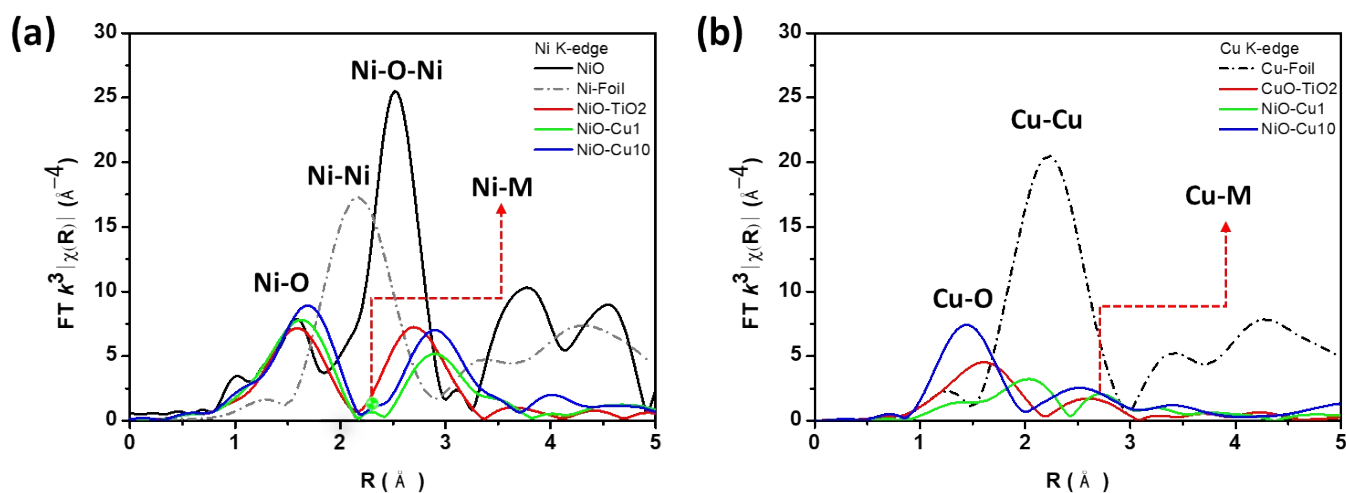

**Figure S6.** FT-EXAFS spectra at the (a) Ni K-edge and (b) Cu K-edge.

**Table S1.** Quantitative results obtained from XAS model fitting at the Ni and Cu K-edges.

| Sample               | Ni K-edge |      |       | Cu K-edge |      |       |
|----------------------|-----------|------|-------|-----------|------|-------|
|                      | bond pair | CN   | R (Å) | bond pair | CN   | R (Å) |
| NiO-Cu1              | Ni-Ni     | 0.89 | 2.195 | Cu-Cu     | 1.08 | 2.196 |
|                      | Ni-O      | 4.45 | 2.047 | Cu-O      | 2.43 | 2.009 |
|                      | Ni-Cu     | 0.76 | 2.028 | Cu-Ni     | 0.98 | 2.198 |
| NiO-Cu10             | Ni-Ni     | N/A  |       | Cu-Cu     | N/A  |       |
|                      | Ni-O      | 5.58 | Cu-O  | Cu-O      | 5.27 | 2.014 |
|                      | Ni-Cu     | N/A  |       | Cu-Ni     | N/A  |       |
| NiO-TiO <sub>2</sub> | Ni-Ni     | 0.75 | 2.196 |           |      |       |
|                      | Ni-O      | 4.67 | 2.038 |           | N/A  |       |

## Catalytic Activity Measurement

The catalytic activity of as-prepared catalysts has been measured as per the previously reported method. [22] The following steps have been used to calculate the CH<sub>4</sub> production yield:

1. In the first step, the full-scale GC curve has been obtained.
2. Then after, the peak area of CH<sub>4</sub> peak has been integrated.
3. The integrated area of CH<sub>4</sub> peak (Experimental sample) is divided by the integrated area of CH<sub>4</sub> peak (Pure CH<sub>4</sub> gas in a 20 sccm flow rate) and times the concentration of CH<sub>4</sub> (29.9 ppmv marked on gas bottle). ----- Eq. 1
4. Transform the unit of ppmv to μg: ppmv is divided by the volume (in normal temperature and pressure conditions, i.e. 24.45 litre) and times the molecular weight. -----Eq. 2

$$\text{CH}_4(\mu\text{g}) = \text{CH}_4 \div 24.45 (\text{mole}) \times \text{M.W.} \left( \frac{\text{g}}{\text{mole}} \right) \left( \frac{\mu\text{g}}{\text{g}} \right) \text{----- Eq. 2}$$

6. Transform from μg to μmol: μg is divided by molecular weight. -----Eq. 3
7. Finally, μmol is divided by the weight of catalyst (g). -----Eq. 4
8. Furthermore, the unit μmol/gm has been changed to mmol/gm/h by using the following equation.

$$\text{CH}_4 \text{ productivity (mmol/gm/h)} = \text{CH}_4 \text{ production yield (}\mu\text{mol/gm)} \times 3600/1000 \text{.....Eq.5}$$

➔ The CH<sub>4</sub> selectivity has been calculated by using the following equation:

$$\text{CH}_4 \text{ selectivity (\%)} = \text{CH}_4 \text{ Yield} / \text{CO Yield} + \text{CH}_4 \text{ Yield} * 100$$

**Table S2.** The benchmark table for the various catalysts for CO<sub>2</sub> methanation.

| Catalyst Support               | Metal contents                           | Temperature (° C) | Feeding gas                                               | S <sub>CH4</sub> (%)* | Yield <sub>CH4</sub> (μmol/g) | References                                                     |                                                          |
|--------------------------------|------------------------------------------|-------------------|-----------------------------------------------------------|-----------------------|-------------------------------|----------------------------------------------------------------|----------------------------------------------------------|
| TiO <sub>2</sub>               | NiO-CuI                                  | 300`              | CO <sub>2</sub> : H <sub>2</sub> = 1: 3                   | 92.5                  | 7916                          | This study                                                     |                                                          |
| TiO <sub>2</sub>               | NiFe                                     | 300`              | CO <sub>2</sub> : H <sub>2</sub> = 1: 3                   | 92.5                  | 6766.2                        | Chemical Engineering Journal 493, 152834                       |                                                          |
| TiO <sub>2</sub>               | Ni-SA+NP                                 | 300`              | CO <sub>2</sub> : H <sub>2</sub> = 1: 3                   | 90                    | 4658                          | <i>ChemCatChem</i> 18 (1), e00938                              |                                                          |
| CNT                            | NiPd-TMOS (NiO <sub>7</sub> Pd-T)        | ~300              | CO <sub>2</sub> : H <sub>2</sub> = 1: 3                   | N/A                   | 1905.1                        | <i>J. Mater. Chem. A</i> , 2020,8, 12744-12756                 |                                                          |
| Al <sub>2</sub> O <sub>3</sub> | 0.1% Pd, 10%Ni, 6.1% “Na <sub>2</sub> O” | 500               | 7.5% CO <sub>2</sub> , 15% H <sub>2</sub> /N <sub>2</sub> | N/A                   | 180.0                         | <i>Green Chemistry</i> , 2015, 17, 2647-2663.                  |                                                          |
|                                | 0.1% Pt, 10%Ni, 6.1% “Na <sub>2</sub> O” |                   |                                                           |                       | 160.0                         |                                                                |                                                          |
|                                | 1% Pt, 10%Ni, 6.1% “Na <sub>2</sub> O”   |                   |                                                           |                       | 250.0                         |                                                                |                                                          |
|                                | Ru15%CaO                                 | 400               | 1.4% CO <sub>2</sub> + 10% H <sub>2</sub>                 | N/A                   | 414.0                         | <i>Applied Catalysis B-Environmental</i> , 2019, 256, 11.      |                                                          |
|                                | 1% Ru, 10% Ni, 6.1% “Na <sub>2</sub> O”  | 320               | 7.5% CO <sub>2</sub> , 15% H <sub>2</sub> /N <sub>2</sub> | ~100                  | 380.0                         | <i>Green Chemistry</i> , 2015, 17, 2647-2663.                  |                                                          |
|                                | Ru10%Na <sub>2</sub> CO <sub>3</sub>     | 310               | 1.4% CO <sub>2</sub> + 10% H <sub>2</sub>                 | N/A                   | 383.0                         | <i>Applied Catalysis B-Environmental</i> , 2019, 256, 11.      |                                                          |
|                                | 5 wt.% Ni/2 wt.% ceria                   | 300               | CO <sub>2</sub> : H <sub>2</sub> = 1: 4                   | 100                   | N/A                           | <i>Applied Catalysis B-Environmental</i> , 2019, 254, 531-540. |                                                          |
|                                | 20 wt.% Ni/H                             | 300               |                                                           | >99                   |                               |                                                                |                                                          |
| ZrO <sub>2</sub>               | 2CA-Co/ZrO <sub>2</sub>                  | 400               |                                                           | 99                    |                               |                                                                |                                                          |
| SiO <sub>2</sub>               | Ni/SiOx-2                                | 400               |                                                           | 91.4                  |                               |                                                                | <i>New Journal of Chemistry</i> , 2019, 43, 13217-13224. |
|                                | Ni/SiO <sub>2</sub>                      | 250               |                                                           | ~100                  |                               |                                                                |                                                          |
| CeO <sub>2</sub>               | 10 wt% Ni/CeO <sub>2</sub>               | 350               |                                                           | 100                   |                               |                                                                | <i>Green Chemistry</i> , 2015, 17, 2647-2663.            |

|  |                                                                                                  |        |                                          |     |       |                                                                                       |
|--|--------------------------------------------------------------------------------------------------|--------|------------------------------------------|-----|-------|---------------------------------------------------------------------------------------|
|  | 25Ni-20CeO <sub>2</sub>                                                                          | 300    |                                          | 100 |       | <i>Fuel Processing Technology</i> , 2019, 193, 114-122.                               |
|  | NiFe <sub>2</sub> O <sub>4</sub>                                                                 | 1273 K | 100 ml/min 50%<br>CO <sub>2</sub> /Ar    |     | 125.9 | <i>Applied Surface Science</i> <b>2019</b> , 489, 693-700                             |
|  | LaSrO <sub>3</sub>                                                                               | 1273 K | 100 ml/min 50%<br>CO <sub>2</sub> /Ar    |     | 124.1 | <i>Applied Surface Science</i> <b>2020</b> , 509, 144908                              |
|  | La <sub>0.3</sub> Sr <sub>0.7</sub> Co <sub>0.7</sub> Fe <sub>0.3</sub> O <sub>3</sub><br>(LSCF) | 973 K  | H <sub>2</sub> O: CO <sub>2</sub> = 1: 1 |     | 705   | <i>International Journal of Hydrogen Energy</i> <b>2021</b> ,<br>46 (48), 24666-24675 |
